# Supplementary material for: The Eulerian urban dispersion model EPISODE. Part II:Extensions to the source dispersion and photochemistry forEPISODE-CityChem v1.2 and its application to the city of Hamburg
Source: Copernicus journal article supplement (doi:10.5194/gmd-2018-325), 2019-01-11
Supplement: Supplementary file 1 [file gmd-2018-325-supplement.pdf]

## Supplementary Materials

### **The Eulerian urban dispersion model EPISODE. Part II: Extensions to the source dispersion and photochemistry for EPISODE-CityChem and its application to the city of Hamburg**

Matthias Karl<sup>1</sup>, Sam-Erik Walker<sup>2</sup>, Sverre Solberg<sup>2</sup>, Martin O. P. Ramacher<sup>1</sup>

[1] Chemistry Transport Modelling, Helmholtz-Zentrum Geesthacht, Geesthacht, Germany.

[2] Norwegian Institute for Air Research (NILU), Kjeller, Norway.

Correspondence to: M. Karl (matthias.karl@hzg.de)

**Table S1:** Atmospheric stability classes in the sub-grid model components.

| Stability class | Name              | Temperature difference $\Delta T$ between 10 m and 25 m | Mapping to P-G class | Line-source parameterization of ambient turbulence |       |        |        |
|-----------------|-------------------|---------------------------------------------------------|----------------------|----------------------------------------------------|-------|--------|--------|
|                 |                   |                                                         |                      | a                                                  | b     | c      | d      |
| 1               | Unstable          | $\Delta T < -0.5^\circ$                                 | A, B, C              | 110.62                                             | 0.932 | 18.333 | 1.8096 |
| 2               | Neutral           | $-0.5^\circ < \Delta T < 0.0^\circ$                     | D                    | 86.49                                              | 0.923 | 14.333 | 1.7706 |
| 3               | Moderately stable | $0.0^\circ < \Delta T < 0.5^\circ$                      | E                    | 61.14                                              | 0.915 | 12.5   | 1.0857 |
| 4               | Stable            | $\Delta T > 0.5^\circ$                                  | F                    | 61.14                                              | 0.915 | 12.5   | 1.0857 |

**Table S2:** Chemical reactions and photo-dissociation reactions of the EmChem03-mod scheme. For notes on rate coefficient functions see end of table.

| Reaction no.               | Educts                           | Products                           | Rate coefficient                                                                             |
|----------------------------|----------------------------------|------------------------------------|----------------------------------------------------------------------------------------------|
| <i>Inorganic chemistry</i> |                                  |                                    |                                                                                              |
| IN-1                       | OP + O <sub>2</sub> + M          | → O <sub>3</sub>                   | $5.67\text{E-}34 \times M \times \text{O}_2 \times (T/300)^{-2.8}$                           |
| IN-2                       | OD + M                           | → OP                               | $1.8\text{E-}11 \exp(107/T) \times \text{N}_2 + 3.2\text{E-}11 \exp(67/T) \times \text{O}_2$ |
| IN-3                       | OP + NO + M                      | → NO <sub>2</sub>                  | $k_{tr}(\text{NO} + \text{OP})$                                                              |
| IN-4                       | OD + H <sub>2</sub> O            | → 2.0 OH                           | $2.2\text{E-}10 \times \text{H}_2\text{O}$                                                   |
| IN-5                       | O <sub>3</sub> + NO              | → NO <sub>2</sub> + O <sub>2</sub> | $1.4\text{E-}12 \exp(-1310/T)$                                                               |
| IN-6                       | O <sub>3</sub> + NO <sub>2</sub> | → NO <sub>3</sub> + O <sub>2</sub> | $1.4\text{E-}12 \exp(-2470/T)$                                                               |
| IN-7                       | O <sub>3</sub> + OH              | → HO <sub>2</sub> + O <sub>2</sub> | $1.7\text{E-}12 \exp(-940/T)$                                                                |
| IN-8                       | O <sub>3</sub> + HO <sub>2</sub> | → OH + 2 O <sub>2</sub>            | $2.03\text{E-}16 \times (300/T)^{-4.57} \exp(693/T)$                                         |

Table S2: Continued.

|                                |                                                  |                                                           |                                                           |
|--------------------------------|--------------------------------------------------|-----------------------------------------------------------|-----------------------------------------------------------|
| IN-9                           | NO + NO <sub>3</sub>                             | → NO <sub>2</sub> + NO <sub>2</sub>                       | 1.8E-11 exp(110/ <i>T</i> )                               |
| IN-10                          | NO + HO <sub>2</sub>                             | → NO <sub>2</sub> + OH                                    | 3.6E-12 exp(270/ <i>T</i> )                               |
| IN-11                          | NO <sub>3</sub> + HO <sub>2</sub>                | → NO <sub>2</sub> + OH + O <sub>2</sub>                   | 3.5E-12                                                   |
| IN-12                          | NO <sub>2</sub> + NO <sub>3</sub>                | → N <sub>2</sub> O <sub>5</sub>                           | <i>ktr</i> (NO <sub>2</sub> + NO <sub>3</sub> )           |
| IN-13                          | NO <sub>2</sub> + OH + M                         | → HNO <sub>3</sub>                                        | <i>ktr</i> (NO <sub>2</sub> + OH)                         |
| IN-14                          | N <sub>2</sub> O <sub>5</sub>                    | → NO <sub>2</sub> + NO <sub>3</sub>                       | <i>ktr</i> (N <sub>2</sub> O <sub>5</sub> )               |
| IN-15                          | OH + H <sub>2</sub>                              | → HO <sub>2</sub> + H <sub>2</sub> O                      | 7.7E-12 exp(-2100/ <i>T</i> )                             |
| IN-16                          | OH + HO <sub>2</sub>                             | → O <sub>2</sub> + H <sub>2</sub> O                       | 4.8E-11 exp(250/ <i>T</i> )                               |
| IN-17                          | OH + H <sub>2</sub> O <sub>2</sub>               | → HO <sub>2</sub> + H <sub>2</sub> O                      | 2.9E-12 exp(-160/ <i>T</i> )                              |
| IN-18                          | HO <sub>2</sub> + HO <sub>2</sub>                | → H <sub>2</sub> O <sub>2</sub>                           | <i>FH2O</i> × 2.2E-13 exp(600/ <i>T</i> )                 |
| IN-19                          | HO <sub>2</sub> + HO <sub>2</sub> + M            | → H <sub>2</sub> O <sub>2</sub>                           | <i>FH2O</i> × 1.9E-33 exp(980/ <i>T</i> )                 |
| IN-20                          | OH + HNO <sub>3</sub>                            | → NO <sub>3</sub> + H <sub>2</sub> O                      | <i>k</i> (OH + HNO <sub>3</sub> )                         |
| IN-21                          | SO <sub>2</sub> + OH                             | → HO <sub>2</sub> + H <sub>2</sub> SO <sub>4</sub>        | <i>ktr</i> (SO <sub>2</sub> + OH)                         |
| IN-22                          | SO <sub>2</sub> + CH <sub>3</sub> O <sub>2</sub> | → H <sub>2</sub> SO <sub>4</sub> + HCHO + HO <sub>2</sub> | 4.0E-17                                                   |
| IN-23                          | OH + HONO                                        | → NO <sub>2</sub>                                         | 2.5E-12 exp(-260/ <i>T</i> )                              |
| IN-24                          | OH + NO                                          | → HONO                                                    | <i>ktr</i> (OH + NO)                                      |
| <i>Heterogeneous chemistry</i> |                                                  |                                                           |                                                           |
| HE-1                           | H <sub>2</sub> SO <sub>4</sub>                   | → aerosol sink                                            | 5.0E-6 × M / 2.55E19                                      |
| <i>Methane chemistry</i>       |                                                  |                                                           |                                                           |
| MA-1                           | OH + CH <sub>4</sub>                             | → CH <sub>3</sub> O <sub>2</sub>                          | 1.85E-20 × <i>T</i> <sup>2.8</sup> × exp(-987/ <i>T</i> ) |
| MA-2                           | CH <sub>3</sub> O <sub>2</sub> + NO              | → HCHO + HO <sub>2</sub> + NO <sub>2</sub>                | 2.3E-12 exp(360/ <i>T</i> )                               |
| MA-3                           | CH <sub>3</sub> O <sub>2</sub> + NO <sub>3</sub> | → HCHO + HO <sub>2</sub> + NO <sub>2</sub>                | 1.3E-12                                                   |
| MA-4                           | OH + CH <sub>3</sub> OH                          | → HO <sub>2</sub> + HCHO + H <sub>2</sub> O               | 6.38E-18 exp(144/ <i>T</i> ) × <i>T</i> <sup>2</sup>      |

Table S2: Continued.

|                                     |                                                                  |                                                                                                                                                                                      |                                                                  |
|-------------------------------------|------------------------------------------------------------------|--------------------------------------------------------------------------------------------------------------------------------------------------------------------------------------|------------------------------------------------------------------|
| MA-5                                | HO <sub>2</sub> + CH <sub>3</sub> O <sub>2</sub>                 | → 0.9 CH <sub>3</sub> O <sub>2</sub> H + 0.1 HCHO                                                                                                                                    | 3.8E-13 exp(780/ <i>T</i> )                                      |
| MA-6                                | CH <sub>3</sub> O <sub>2</sub> H + OH                            | → HCHO + OH                                                                                                                                                                          | 1.0E-12 exp(190/ <i>T</i> )                                      |
| MA-7                                | CH <sub>3</sub> O <sub>2</sub> H + OH                            | → CH <sub>3</sub> O <sub>2</sub> + H <sub>2</sub> O                                                                                                                                  | 1.9E-12 exp(190/ <i>T</i> )                                      |
| MA-8                                | OH + HCHO                                                        | → CO + HO <sub>2</sub> + HO <sub>2</sub>                                                                                                                                             | 1.25E-17 × <i>T</i> <sup>2</sup> × exp(615/ <i>T</i> )           |
| MA-9                                | NO <sub>3</sub> + HCHO                                           | → HNO <sub>3</sub> + CO + HO <sub>2</sub>                                                                                                                                            | 2.0E-12 exp(-2440/ <i>T</i> )                                    |
| MA-10                               | OH + CO                                                          | → HO <sub>2</sub> + CO <sub>2</sub>                                                                                                                                                  | 1.44E-13 + 3.43E-33 × <i>M</i>                                   |
| <i>Ethane and ethanol chemistry</i> |                                                                  |                                                                                                                                                                                      |                                                                  |
| EA-1                                | OH + C <sub>2</sub> H <sub>6</sub>                               | → C <sub>2</sub> H <sub>5</sub> O <sub>2</sub> + H <sub>2</sub> O                                                                                                                    | 6.9E-12 exp(-1000/ <i>T</i> )                                    |
| EA-2                                | C <sub>2</sub> H <sub>5</sub> O <sub>2</sub> + NO                | → HO <sub>2</sub> + CH <sub>3</sub> CHO + NO <sub>2</sub>                                                                                                                            | 2.55E-12 exp(380/ <i>T</i> )                                     |
| EA-3                                | C <sub>2</sub> H <sub>5</sub> O <sub>2</sub> + NO <sub>3</sub>   | → HO <sub>2</sub> + CH <sub>3</sub> CHO + NO <sub>2</sub>                                                                                                                            | 2.3E-12                                                          |
| EA-4                                | OH + CH <sub>3</sub> CHO                                         | → 0.95 CH <sub>3</sub> COO <sub>2</sub> + 0.05<br>CH <sub>3</sub> O <sub>2</sub> + 0.05 CO                                                                                           | 4.4E-12 exp(365/ <i>T</i> )                                      |
| EA-5                                | CH <sub>3</sub> COO <sub>2</sub> + NO <sub>2</sub><br>+ <i>M</i> | → PAN                                                                                                                                                                                | <i>ktr</i> (CH <sub>3</sub> COO <sub>2</sub> + NO <sub>2</sub> ) |
| EA-6                                | PAN + <i>M</i>                                                   | → CH <sub>3</sub> COO <sub>2</sub> + NO <sub>2</sub>                                                                                                                                 | <i>ktr</i> (PAN)                                                 |
| EA-7                                | CH <sub>3</sub> COO <sub>2</sub> + NO                            | → NO <sub>2</sub> + CH <sub>3</sub> O <sub>2</sub> + CO <sub>2</sub>                                                                                                                 | 7.5E-12 exp(290/ <i>T</i> )                                      |
| EA-8                                | OH + C <sub>2</sub> H <sub>5</sub> OH                            | → CH <sub>3</sub> CHO + HO <sub>2</sub>                                                                                                                                              | 6.7E-18 exp(511/ <i>T</i> ) × <i>T</i> <sup>2</sup>              |
| <i>n-butane chemistry</i>           |                                                                  |                                                                                                                                                                                      |                                                                  |
| NB-1                                | OH + NC <sub>4</sub> H <sub>10</sub>                             | → SECC <sub>4</sub> H <sub>9</sub> O <sub>2</sub>                                                                                                                                    | 2.03E-17 exp(78/ <i>T</i> ) × <i>T</i> <sup>2</sup>              |
| NB-2                                | NO + SECC <sub>4</sub> H <sub>9</sub> O <sub>2</sub>             | → NO <sub>2</sub> + 0.65 HO <sub>2</sub> + 0.65<br>CH <sub>3</sub> COC <sub>2</sub> H <sub>5</sub> + 0.35<br>CH <sub>3</sub> CHO + 0.35 C <sub>2</sub> H <sub>5</sub> O <sub>2</sub> | 2.54E-12 exp(360/ <i>T</i> )                                     |
| NB-3                                | OH + CH <sub>3</sub> COC <sub>2</sub> H <sub>5</sub>             | → CH <sub>3</sub> COCHO <sub>2</sub> CH <sub>3</sub>                                                                                                                                 | 2.53E-18 exp(503/ <i>T</i> ) × <i>T</i> <sup>2</sup>             |
| NB-4                                | CH <sub>3</sub> COCHO <sub>2</sub> CH <sub>3</sub><br>+ NO       | → NO <sub>2</sub> + CH <sub>3</sub> COO <sub>2</sub> +<br>CH <sub>3</sub> CHO                                                                                                        | 2.54E-12 exp(360/ <i>T</i> )                                     |

Table S2: Continued.

|                           |                   |                                                                                               |                                                     |
|---------------------------|-------------------|-----------------------------------------------------------------------------------------------|-----------------------------------------------------|
| <i>Ethene chemistry</i>   |                   |                                                                                               |                                                     |
| EE-1                      | C2H4 + OH + M     | → CH2O2CH2OH                                                                                  | <i>ktr</i> (OH + C2H4)                              |
| EE-2                      | CH2O2CH2OH + NO   | → NO2 + 2 HCHO + HO2                                                                          | 2.54E-12 exp(360/ <i>T</i> )                        |
| EE-3                      | C2H4 + O3         | → 1.14 HCHO + 0.63 CO + 0.13 HO2 + 0.13 OH + 0.14 H2O2                                        | 9.1E-15 exp(-2580/ <i>T</i> )                       |
| <i>Propene chemistry</i>  |                   |                                                                                               |                                                     |
| PE-1                      | OH + C3H6 + M     | → CH3CHO2CH2OH                                                                                | <i>ktr</i> (OH + C3H6)                              |
| PE-2                      | NO + CH3CHO2CH2OH | → NO2 + CH3CHO + HCHO + HO2                                                                   | 2.54E-12 exp(360/ <i>T</i> )                        |
| PE-3                      | O3 + C3H6         | → 0.545 HCHO + 0.545 CH3CHO + 0.56 CO + 0.36 OH + 0.28 HO2 + 0.09 H2O2 + 0.1 CH4 + 0.28 CH3O2 | 5.5E-15 exp(-1880/ <i>T</i> )                       |
| <i>o-xylene chemistry</i> |                   |                                                                                               |                                                     |
| OX-1                      | OXYL + OH         | → OXYLOHO2                                                                                    | 1.36E-11                                            |
| OX-2                      | OXYLOHO2 + NO     | → NO2 + CH3COCHO + MEMALDIAL + HO2                                                            | 2.54E-12 exp(360/ <i>T</i> )                        |
| OX-3                      | MEMALDIAL + OH    | → MEMALO2                                                                                     | 5.58E-11                                            |
| OX-4                      | MEMALO2 + NO      | → NO2 + HO2 + CH3COCHO + HCOCHO                                                               | 2.54E-12 exp(360/ <i>T</i> )                        |
| OX-5                      | OH + CH3COCHO     | → CH3COO2 + CO                                                                                | 1.9E-12 exp(575/ <i>T</i> )                         |
| OX-6                      | OH + HCOCHO       | → HO2 + 2 CO                                                                                  | 6.6E-18 exp(820/ <i>T</i> ) × <i>T</i> <sup>2</sup> |
| <i>Isoprene chemistry</i> |                   |                                                                                               |                                                     |
| IS-1                      | C5H8 + OH         | → ISOPO2                                                                                      | 2.7E-11 exp(390/ <i>T</i> )                         |
| IS-2                      | ISOPO2 + NO       | → 0.776 MVK + 0.776 HCHO + 0.12 ISOPO2 + HO2 + NO2                                            | 2.54E-12 exp(360/ <i>T</i> )                        |
| IS-3                      | MVK + OH          | → MVKO2                                                                                       | 4.1E-12 exp(453/ <i>T</i> )                         |
| IS-4                      | MVKO2 + NO        | → CH3COCHO + HCHO + HO2 + NO2                                                                 | 1.4E-12 exp(-180/ <i>T</i> )                        |

Table S2: Continued.

| Reaction no.                | Educts    | Products                      | $\epsilon_1$ | $\epsilon_2$ | $\epsilon_3$ | $\epsilon_4$ |
|-----------------------------|-----------|-------------------------------|--------------|--------------|--------------|--------------|
| <i>Photolysis reactions</i> |           |                               |              |              |              |              |
| PH-1                        | O3        | → OD                          | 2.00E-04     | 1.400        | 0.86         | 0.33         |
| PH-2                        | O3        | → OP                          | 1.23E-03     | 0.600        | 0.92         | 0.41         |
| PH-3                        | NO2       | → OP + NO                     | 1.45E-02     | 0.400        | 0.91         | 0.38         |
| PH-4                        | H2O2      | → 2 OH                        | 2.20E-05     | 0.750        | 0.88         | 0.35         |
| PH-5                        | HNO3      | → NO2 + OH                    | 3.00E-06     | 1.250        | 0.87         | 0.33         |
| PH-6                        | HCHO      | → CO + 2 HO2                  | 5.40E-05     | 0.790        | 0.88         | 0.34         |
| PH-7                        | HCHO      | → CO + H2                     | 6.65E-05     | 0.600        | 0.89         | 0.35         |
| PH-8                        | CH3CHO    | → CH3O2 + HO2 + CO            | 1.35E-05     | 0.940        | 0.87         | 0.33         |
| PH-9                        | CH3COC2H5 | → CH3COO2 + C2H5O2            | 2.43E-05     | 0.877        | 0.92         | 0.41         |
| PH-10                       | CH3COCHO  | → CH3COO2 + CO + HO2          | 9.72E-05     | 0.877        | 0.92         | 0.41         |
| PH-11                       | HCOCHO    | → 1.9 CO + 0.1 HCHO + 0.5 HO2 | 5.40E-04     | 0.790        | 0.92         | 0.41         |
| PH-12                       | NO3       | → NO + O2                     | 3.53E-02     | 0.081        | 0.92         | 0.42         |
| PH-13                       | NO3       | → NO2 + OP                    | 8.94E-02     | 0.059        | 0.92         | 0.42         |
| PH-14                       | N2O5      | → NO2 + NO3                   | 3.32E-05     | 0.567        | 0.88         | 0.35         |
| PH-15                       | CH3O2H    | → HCHO + OH + HO2             | 2.27E-05     | 0.620        | 0.88         | 0.35         |
| PH-16                       | HONO      | → OH + NO                     | 3.22E-03     | 0.400        | 0.91         | 0.38         |

Notes:

Special rate constants and reaction parameters:

$$FH2O = 1 + 1.4E-21 \exp(2200/T) \times H2O;$$

$$k(OH + HNO3) = K_1 + (K_3 \times M)/(1.0 + (K_3 \times M/K_4)) \text{ with } K_1 = 2.4E-14 \exp(460/T), K_3 = 6.5E-34 \exp(1335/T), K_4 = 2.7E-17 \exp(2199/T);$$

Rate coefficients for three-body reactions using the Troe expression (e.g. Atkinson et al., 2006), where the reaction rates are calculated as:  $ktr = \frac{k_0 k_\infty}{k_0 + k_\infty} F$ , with the broadening factor  $F$  calculated using the approximate expression:  $\log_{10} F \cong \frac{\log_{10} F_c}{1 + [\log_{10}(k_0/k_\infty)/N]^2}$ , where  $N = [0.75 - 1.27 \log_{10} F_c]$ , are given as follows:

$ktr(\text{NO}+\text{OP}): k_0/M = 1.0\text{E-}31 (300/T)^{1.6}, k_\infty = 3.0\text{E-}11 (300/T)^{-0.3}, F_c = 0.85;$   
 $ktr(\text{NO}_2+\text{NO}_3): k_0/M = 3.6\text{E-}30 (300/T)^{4.1}, k_\infty = 9.7\text{E-}12 (300/T)^{-0.2}, F_c = 0.35;$   
 $ktr(\text{NO}_2+\text{OH}): k_0/M = 3.3\text{E-}30 (300/T)^{3.0}, k_\infty = 4.1\text{E-}11, F_c = 0.40;$   
 $ktr(\text{N}_2\text{O}_5): k_0/M = 1.3\text{E-}3 (300/T)^{3.5} \exp(-11000/T), k_\infty = 9.7\text{E}14 (300/T)^{-0.1} \exp(-11080/T);$   
 $ktr(\text{OH}+\text{NO}): k_0/M = 7.4\text{E-}31 (300/T)^{2.4}, k_\infty = 3.3\text{E-}11 (300/T)^{0.3}, F_c = \exp(-T/1420);$   
 $ktr(\text{CH}_3\text{OO}_2 + \text{NO}_2): k_0/M = 2.7\text{E-}28 (300/T)^{7.1}, k_\infty = 1.2\text{-}11 (300/T)^{0.9}, F_c = 0.3;$   
 $ktr(\text{PAN}): k_0/M = 4.9\text{E-}3 (300/T)^{-12100}, k_\infty = 5.4\text{E}16 \exp(-13830/T), F_c = 0.3;$   
 $ktr(\text{OH}+\text{C}_2\text{H}_4): k_0/M = 8.6\text{E-}29 (300/T)^{3.1}, k_\infty = 9.0\text{E-}12 (300/T)^{0.85}, F_c = 0.48;$   
 $ktr(\text{OH}+\text{C}_3\text{H}_6): k_0/M = 8.0\text{E-}27 (300/T)^{3.5}, k_\infty = 3.0\text{E-}11 (300/T), F_c = 0.5;$   
 $ktr(\text{SO}_2+\text{OH}): k_0/M = 4.0\text{E-}31 (300/T)^{-3.3}, k_\infty = 2.0\text{E-}12, F = 0.45^{1/(1 + \log_{10}(k_0/k_\infty)^2)}$

**Table S3:** Additional chemical reactions and photo-dissociation reactions of EmChem09-mod. The scheme includes all reactions of EmChem03-mod given in Table S2.

| Reaction no. | Educts               | Products                                                              | Rate coefficient                          |
|--------------|----------------------|-----------------------------------------------------------------------|-------------------------------------------|
| MA-11        | CH3O2 + CH3O2        | → 2. HCHO + 2. HO2                                                    | 7.4E-13 exp(-520/T)                       |
| MA-12        | CH3O2 + CH3O2        | → CH3OH + HCHO                                                        | 1.03E-13 exp(365/T) - 7.4E-13 exp(-520/T) |
| EA-9         | C2H5O2 + HO2         | → C2H5OOH                                                             | 3.8E-13 exp(900/T)                        |
| EA-10        | C2H5OOH + OH         | → CH3CHO + OH                                                         | 8.01E-12                                  |
| EA-11        | C2H5OOH + OH         | → C2H5O2                                                              | 1.9E-12 exp(190/T)                        |
| EA-12        | CH3COO2 + HO2        | → 0.41 CH3COO2H + 0.15 O3<br>+ 0.44 OH + 0.44 CH3O2 +<br>0.15 CH3COOH | 5.2E-13 exp(980/T)                        |
| EA-13        | CH3COO2H + OH        | → CH3COO2                                                             | 1.9E-12 exp(190/T)                        |
| EA-14        | CH3O2 +<br>CH3COO2   | → 0.9 HO2 + HCHO + 0.9<br>CH3O2 + 0.1 CH3COOH                         | 2.0E-12 exp(500/T)                        |
| EA-15        | CH3COO2 +<br>CH3COO2 | → CH3O2 + CH3O2                                                       | 2.9E-12 exp(500/T)                        |

Table S3: Continued.

|       |                    |                   |                                      |
|-------|--------------------|-------------------|--------------------------------------|
| NB-5  | SECC4H9O2 + HO2    | → 0.95 BURO2H     | $0.625 \times 2.91E-13 \exp(1300/T)$ |
| NB-6  | CH3COCHO2CH3 + HO2 | → MEKO2H          | $0.625 \times 2.91E-13 \exp(1300/T)$ |
| NB-7  | MEKO2H + OH        | → CH3COCHO2CH3    | $1.9E-12 \exp(190/T)$                |
| NB-8  | BURO2H + OH        | → SECC4H9O2       | $1.9E-12 \exp(190/T)$                |
| NB-9  | BURO2H + OH        | → OH + CH3COC2H5  | 2.15E-11                             |
| EE-4  | CH2O2CH2OH + HO2   | → ETRO2H          | 1.2E-11                              |
| EE-5  | ETRO2H + OH        | → CH3CHO + OH     | 1.38E-11                             |
| EE-6  | ETRO2H + OH        | → CH2O2CH2OH      | $1.9E-12 \exp(190/T)$                |
| PE-4  | CH3CHO2CH2OH + HO2 | → 0.795 PRRO2H    | $0.52 \times 2.91E-13 \exp(1300/T)$  |
| PE-5  | PRRO2H + OH        | → CH3COCH2OH + OH | 2.44E-11                             |
| PE-6  | CH3COCH2OH + OH    | → CH3COCHO + HO2  | $1.6E-12 \exp(305/T)$                |
| PE-7  | PRRO2H + OH        | → CH3CHO2CH2OH    | $1.9E-12 \exp(190/T)$                |
| OX-7  | OXYLOHO2 + HO2     | → 0.227 OXYO2H    | $0.859 \times 2.91E-13 \exp(1300/T)$ |
| OX-8  | OXYO2H + OH        | → OXYLOHO2        | 4.2E-11                              |
| OX-9  | MEMALDIAL + HO2    | → MEMALO2H        | $0.706 \times 2.91E-13 \exp(1300/T)$ |
| OX-10 | MEMALO2H + OH      | → MEMALO2         | $1.9E-12 \exp(190/T)$                |
| IS-5  | ISOPO2 + HO2       | → 0.857 ISRO2H    | $1.4E-12 \exp(-180/T)$               |
| IS-6  | ISRO2H + OH        | → OH + ISOPO2     | 7.5E-11                              |
| IS-7  | MVKO2 + HO2        | → MVKO2H          | $0.625 \times 2.91E-13 \exp(1300/T)$ |
| IS-8  | MVKO2H + OH        | → MVKO2           | 2.2E-11                              |



Table S3: Continued.

| <i>Monoterpene chemistry</i>           |                     |   |                                                                                      |
|----------------------------------------|---------------------|---|--------------------------------------------------------------------------------------|
| MT-1                                   | APINENE + OH        | → | PRODAPINOH + MTO2<br>1.2E-11 exp(444/ <i>T</i> )                                     |
| MT-2                                   | APINENE + NO3       | → | PRODAPINNO3 + MTO2<br>1.2E-12 exp(490/ <i>T</i> )                                    |
| MT-3                                   | APINENE + O3        | → | 0.8 PRODAPINO3 + 0.8<br>MTO2 + 0.2 BLOC + 0.46<br>OH<br>6.3E-16 exp(-580/ <i>T</i> ) |
| MT-4                                   | LIMONENE + OH       | → | PRODLIMOOH + MTO2<br>1.7E-10                                                         |
| MT-5                                   | LIMONENE +<br>NO3   | → | PRODLIMONO3 + MTO2<br>1.3E-11                                                        |
| MT-6                                   | LIMONENE + O3       | → | PRODLIMOO3 + 0.67 OH +<br>0.19 HCHO + MTO2<br>2.0E-16                                |
| MT-7                                   | MTO2 + NO           | → | NO2 + HO2 + 0.78<br>MTKETONE<br>2.54E-12 exp(360/ <i>T</i> )                         |
| MT-8                                   | MTO2 + HO2          | → | 0.493 MTO2H<br>0.914 × 2.91E-13 exp(1300/ <i>T</i> )                                 |
| MT-9                                   | MTO2 + CH3O2        | → | MTO2H<br>2.91E-13 exp(1300/ <i>T</i> )                                               |
| MT-10                                  | MTO2 + C2H5O2       | → | MTO2H<br>2.91E-13 exp(1300/ <i>T</i> )                                               |
| MT-11                                  | PRODAPINOH +<br>OH  | → | MTO2<br>1.0E-30                                                                      |
| MT-12                                  | PRODAPINNO3 +<br>OH | → | MTO2<br>1.0E-30                                                                      |
| MT-13                                  | PRODAPINO3 +<br>OH  | → | MTO2<br>1.0E-30                                                                      |
| MT-14                                  | PRODLIMOOH +<br>OH  | → | MTO2<br>1.0E-30                                                                      |
| MT-15                                  | PRODLIMONO3 +<br>OH | → | MTO2<br>1.0E-30                                                                      |
| MT-16                                  | PRODLIMOO3 +<br>OH  | → | MTO2<br>1.0E-30                                                                      |
| MT-17                                  | MTKETONE + OH       | → | MTO2<br>1.0E-30                                                                      |
| MT-18                                  | MTO2H + OH          | → | MTO2<br>1.0E-30                                                                      |
| <i>Semi-volatile organic compounds</i> |                     |   |                                                                                      |
| SV-1                                   | ISOPO2 + NO         | → | 0.003 BLOC + 0.101 BSOC<br>2.54E-12 exp(360/ <i>T</i> )                              |
| SV-2                                   | ISOPO2 + HO2        | → | 0.024 BLOC + 0.119 BSOC<br>0.706 × 2.91E-13 exp(1300/ <i>T</i> )                     |

Table S3: Continued.

|       |                    |                           |                              |
|-------|--------------------|---------------------------|------------------------------|
| SV-3  | MTO2 + NO          | → 0.052 BLOC + 0.184 BSOC | 2.54E-12 exp(360/T)          |
| SV-4  | MTO2 + HO2         | → 0.327 BLOC + 0.180 BSOC | 2.91E-13 exp(1300/T)         |
| SV-5  | BSOC + OH          | → BLOC                    | 4.0E-11                      |
| SV-6  | OXYLOHO2 + NO      | → 0.063 ALOC              | 2.54E-12 exp(360/T)          |
| SV-7  | OXYLOHO2 + HO2     | → 0.710 ALOC              | 2.91E-13 exp(1300/T)         |
| SV-8  | CH3CHO2CH2OH + HO2 | → 0.205 ALOC              | 0.52 × 2.91E-13 exp(1300/T)  |
| SV-9  | SECC4H9O2 + HO2    | → 0.050 ALOC              | 0.625 × 2.91E-13 exp(1300/T) |
| SV-10 | BLOC + OH          | → MTO2                    | 1.0E-30                      |
| SV-11 | ALOC + OH          | → OXYLOHO2                | 1.0E-30                      |

*Photolysis reactions*

|       |          |                                                             | ε1       | ε2    | ε3   | ε4   |
|-------|----------|-------------------------------------------------------------|----------|-------|------|------|
| PH-17 | C2H5OOH  | → HO2 + CH3CHO + OH                                         | 2.27E-05 | 0.620 | 0.88 | 0.35 |
| PH-18 | ETRO2H   | → HO2 + OH + 1.56 HCHO + 0.22 CH3CHO                        | 2.27E-05 | 0.620 | 0.88 | 0.35 |
| PH-19 | BURO2H   | → OH + 0.65 HO2 + 0.65 CH3CO2H5 + 0.25 CH3CHO + 0.25 C2H5O2 | 2.27E-05 | 0.620 | 0.88 | 0.35 |
| PH-20 | PRRO2H   | → CH3CHO + HCHO + HO2                                       | 2.27E-05 | 0.620 | 0.88 | 0.35 |
| PH-21 | MEKO2H   | → CH3CHO + CH3COO2 + OH                                     | 2.27E-05 | 0.620 | 0.88 | 0.35 |
| PH-22 | CH3COO2H | → CH3O2 + OH                                                | 2.27E-05 | 0.620 | 0.88 | 0.35 |
| PH-23 | OXYO2H   | → OH + CH3COCHO + MEMALDIAL + HO2                           | 2.27E-05 | 0.620 | 0.88 | 0.35 |
| PH-24 | MEMALO2H | → OH + HO2 + HCOCHO + CH3COCHO                              | 2.27E-05 | 0.620 | 0.88 | 0.35 |

**Table S4:** Chemical reactions and photo-dissociation reactions of the EP10-Plume scheme.

| Reaction no. | Educts       | Products         | Rate coefficient                                               |              |              |              |
|--------------|--------------|------------------|----------------------------------------------------------------|--------------|--------------|--------------|
| IN-1         | OP + O2 + M  | → O3             | $5.67E-34 \times M \times O2 \times (T/300)^{-2.8}$            |              |              |              |
| IN-2         | OD + M       | → OP             | $1.8E-11 \exp(107/T) \times N2 + 3.2E-11 \exp(67/T) \times O2$ |              |              |              |
| IN-3         | OP + NO + M  | → NO2            | $ktr(NO + OP)$                                                 |              |              |              |
| IN-4         | OD + H2O     | → 2.0 OH         | $2.2E-10 \times H2O$                                           |              |              |              |
| IN-5         | O3 + NO      | → NO2 + O2       | $1.4E-12 \exp(-1310/T)$                                        |              |              |              |
| IN-7         | O3 + OH      | → HO2 + O2       | $1.7E-12 \exp(-940/T)$                                         |              |              |              |
| IN-8         | O3 + HO2     | → OH + 2 O2      | $2.03E-16 \times (300/T)^{-4.57} \exp(693/T)$                  |              |              |              |
| IN-10        | NO + HO2     | → NO2 + OH       | $3.6E-12 \exp(270/T)$                                          |              |              |              |
| IN-13        | NO2 + OH + M | → HNO3           | $ktr(NO2 + OH)$                                                |              |              |              |
| MA-8         | OH + HCHO    | → CO + HO2 + HO2 | $1.25E-17 \times T^2 \times \exp(615/T)$                       |              |              |              |
| MA-10        | OH + CO      | → HO2 + CO2      | $1.44E-13 + 3.43E-33 \times M$                                 |              |              |              |
|              |              |                  | $\epsilon_1$                                                   | $\epsilon_2$ | $\epsilon_3$ | $\epsilon_4$ |
| PH-1         | O3           | → OD             | 2.00E-04                                                       | 1.400        | 0.86         | 0.33         |
| PH-2         | O3           | → OP             | 1.23E-03                                                       | 0.600        | 0.92         | 0.41         |
| PH-3         | NO2          | → OP + NO        | 1.45E-02                                                       | 0.400        | 0.91         | 0.38         |
| PH-5         | HNO3         | → NO2 + OH       | 3.00E-06                                                       | 1.250        | 0.87         | 0.33         |
| PH-6         | HCHO         | → CO + 2 HO2     | 5.40E-05                                                       | 0.790        | 0.88         | 0.34         |
| PH-7         | HCHO         | → CO + H2        | 6.65E-05                                                       | 0.600        | 0.89         | 0.35         |

**Table S5:** Comparison of performance statistics of CMAQ (4-km res.), EPISODE-CityChem and TAPM for NO<sub>2</sub> based on hourly concentration values for a 14 days period in July 2012 at four urban background monitoring stations. Observed mean concentrations at 52NG, 51BF, 13ST and 27TA are 8.67, 11.96, 21.50, and 12.73  $\mu\text{g m}^{-3}$ , respectively. Number of observations:  $N = 336$ .

| Station code | Model      | $\bar{M}$<br>[ $\mu\text{g/m}^{-3}$ ] | Bias<br>[ $\mu\text{g/m}^{-3}$ ] | Corr<br>[-] | RMSE<br>[ $\mu\text{g/m}^{-3}$ ] |
|--------------|------------|---------------------------------------|----------------------------------|-------------|----------------------------------|
| 52NG         | CMAQ       | 9.43                                  | 0.76                             | 0.55        | 8.27                             |
|              | EPISODE-CC | 4.32                                  | -4.35                            | 0.66        | 4.69                             |
|              | TAPM       | 6.44                                  | -2.23                            | 0.73        | 5.57                             |
| 51BF         | CMAQ       | 7.44                                  | -4.52                            | 0.69        | 4.11                             |
|              | EPISODE-CC | 7.02                                  | -4.94                            | 0.48        | 4.65                             |
|              | TAPM       | 10.00                                 | -1.95                            | 0.51        | 8.13                             |
| 13ST         | CMAQ       | 13.65                                 | -7.85                            | 0.61        | 7.77                             |
|              | EPISODE-CC | 21.98                                 | 0.47                             | 0.58        | 10.19                            |
|              | TAPM       | 20.54                                 | -0.96                            | 0.57        | 13.09                            |
| 27TA         | CMAQ       | 10.12                                 | -2.61                            | 0.45        | 5.38                             |
|              | EPISODE-CC | 8.37                                  | -4.36                            | 0.38        | 7.54                             |
|              | TAPM       | 33.06                                 | 20.33                            | 0.20        | 13.63                            |

**Table S6:** Statistical comparison of meteorological variables modelled with TAPM and observations for 2012 based on hourly values. Statistical parameters: number of observations ( $N$ ), mean (observed, modelled), standard deviation (STD; observed, modelled), overall bias (Bias), correlation (Corr), root mean squared error (RMSE), and index of agreement (IOA).

| Station                     | Meteorological variable                   | $N$  | $\bar{O}$ | $\bar{M}$ | STD <sub>O</sub> | STD <sub>M</sub> | Bias  | Corr | RMSE   | IOA  |
|-----------------------------|-------------------------------------------|------|-----------|-----------|------------------|------------------|-------|------|--------|------|
| Hamburg weather mast (10 m) | Temperature [°C]                          | 8510 | 9.10      | 9.55      | 7.17             | 6.93             | 1.00  | 0.98 | 1.85   | 0.98 |
|                             | Wind speed [m s <sup>-1</sup> ]           | 8604 | 3.00      | 2.95      | 1.55             | 1.32             | -0.08 | 0.87 | 0.76   | 0.93 |
|                             | Wind direction [°]                        | 8604 | 180.6     | 202.8     | 89.5             | 83.0             | 16.94 | 0.79 | 57.54  | 0.89 |
|                             | Tot. solar radiation [W m <sup>-2</sup> ] | 8690 | 116.2     | 138.7     | 193.0            | 212.9            | 26.56 | 0.86 | 110.51 | 0.92 |
| Hamburg weather mast (50 m) | Temperature [°C]                          | 8441 | 9.43      | 9.38      | 7.04             | 6.95             | 0.60  | 0.98 | 1.54   | 0.99 |
|                             | Wind speed [m s <sup>-1</sup> ]           | 8744 | 4.86      | 4.92      | 2.32             | 2.12             | -0.02 | 0.85 | 1.24   | 0.92 |
|                             | Wind direction [°]                        | 8744 | 191.8     | 204.8     | 89.84            | 82.67            | 6.20  | 0.82 | 52.24  | 0.90 |
| DWD Hamburg Airport (10 m)  | Temperature [°C]                          | 8784 | 9.36      | 9.31      | 7.26             | 6.90             | -0.05 | 0.97 | 1.70   | 0.99 |
|                             | Relative humidity [fraction]              | 8784 | 0.806     | 0.798     | 0.149            | 0.149            | -0.08 | 0.74 | 0.11   | 0.86 |

**Table S7:** Stations of the Hamburg air quality monitoring network included in the comparison. Available pollutant measurements for 2012 are indicated by X. Station types: traffic (tra), industrial (ind), urban background (ubg).

| Station code | Station name      | Coordinates (UTM 32N); height (a.s.l.) | Station type | O <sub>3</sub> | SO <sub>2</sub> | NO | NO <sub>2</sub> | PM <sub>2.5</sub> | PM <sub>10</sub> |
|--------------|-------------------|----------------------------------------|--------------|----------------|-----------------|----|-----------------|-------------------|------------------|
| 80KT         | Altona-Elbhang    | 562611 E;<br>5933342 N;<br>25 m        | ubg          |                | X               | X  | X               |                   | X                |
| 21BI         | Billbrook         | 571730 E;<br>5931713 N;<br>5 m         | ind          |                | X               | X  | X               |                   | X                |
| 51BF         | Bramfeld          | 573434 E;<br>5943029 N;<br>31 m        | ubg          | X              |                 | X  | X               |                   |                  |
| 72FI         | Finkenwerder West | 555949 E;<br>5932255 N;<br>0 m         | ind          |                |                 | X  | X               |                   | X                |
| 68HB         | Habichtstrasse    | 569743 E;<br>5938684 N;<br>12 m        | tra          |                |                 | X  | X               | X                 | X                |
| 64KS         | Kieler Strasse    | 562563 E;<br>5935470 N;<br>16 m        | tra          |                |                 | X  | X               | X                 |                  |
| 70MB         | Max-Brauer Allee  | 562473 E;<br>5934507 N;<br>25 m        | tra          |                |                 | X  | X               |                   | X                |
| 17SM         | Stresemannstrasse | 563414 E;<br>5935091 N;<br>20 m        | tra          |                |                 | X  | X               |                   | X                |
| 52NG         | Neugraben         | 556885 E;<br>5926120 N;<br>3 m         | ubg          | X              |                 | X  | X               |                   |                  |
| 13ST         | Sternschanze      | 564134 E;<br>5935504 N;<br>15 m        | ubg          | X              | X               | X  | X               | X                 | X                |
| 20VE         | Veddel            | 567752 E;<br>5930928 N;<br>5 m         | ind          |                | X               | X  | X               | X                 | X                |
| 61WB         | Wilhelmsburg      | 565692 E;<br>5929231 N;<br>3 m         | ubg          |                | X               | X  | X               | X                 | X                |
| 54BL         | Blankenese        | 552066 E;<br>5935753 N;<br>75 m        | ubg          | X              |                 | X  | X               |                   |                  |
| 27TA         | Tatenberg         | 571900 E;<br>5927121 N;<br>2 m         | ubg          | X              |                 | X  | X               |                   |                  |
| 74BT         | Billstedt         | 573088 E;<br>5932744 N;<br>18 m        | ubg          |                |                 | X  | X               |                   |                  |

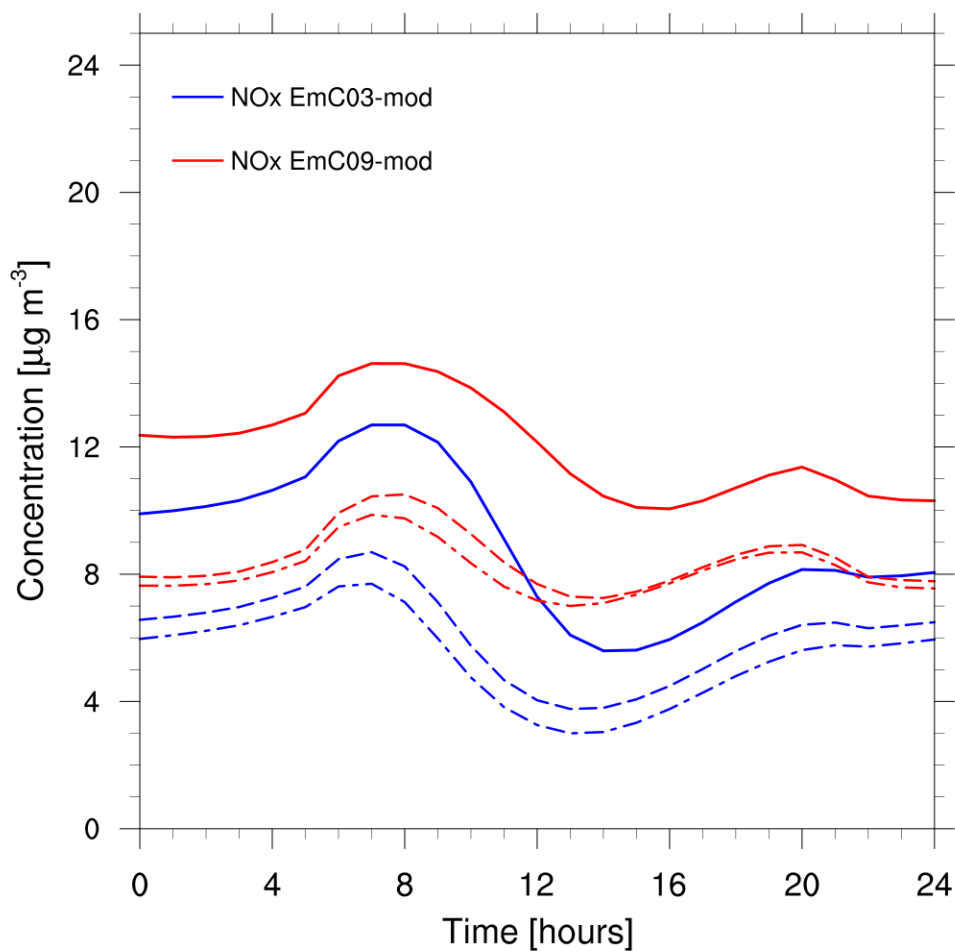

**Figure S1:** Comparison of the daily NO<sub>x</sub> concentration ( $\mu\text{g m}^{-3}$ ) cycle with EmChem09-mod (red lines) with EmChem03-mod (blue lines) for three different VOC/NO<sub>x</sub> ratios. As average from a test run with NO<sub>x</sub> emission of  $4.3 \times 10^{-8} \text{ g s}^{-1} \text{ m}^{-2}$  and NMVOC emissions corresponding to a VOC/NO<sub>x</sub> ratio of 4:1 (solid lines), 8:1 (dashed lines) and 15:1 (dash-dotted lines), respectively.

(a)

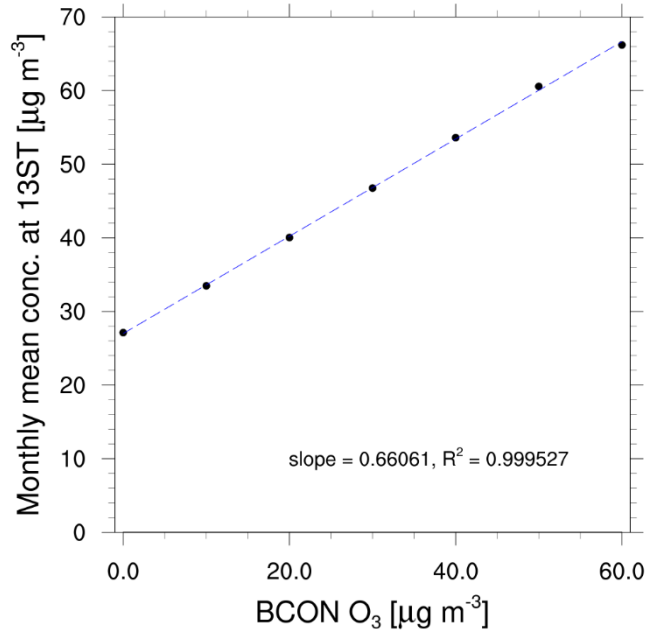

(b)

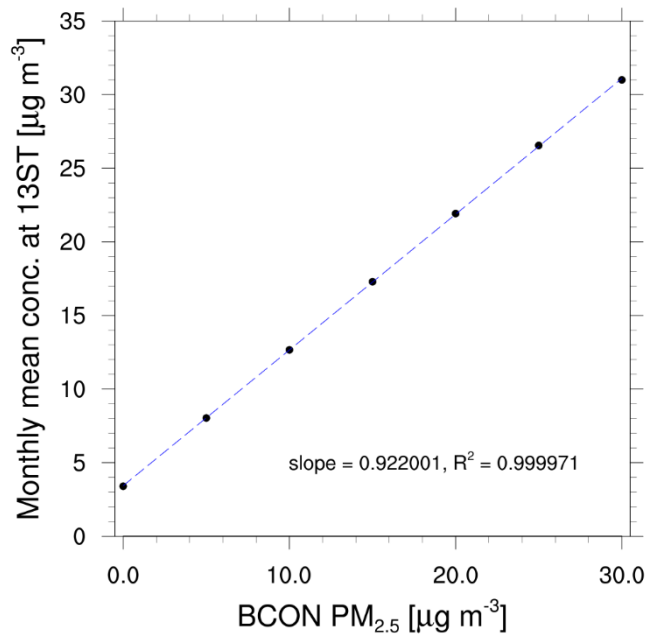

**Figure S2:** Test of the boundary conditions for the lateral entrainment into the model domain of Hamburg. Relationship between the monthly mean concentration (July 2012) in the grid cell where station 13ST is located and the BCON offset added to the CMAQ concentrations at the lateral boundaries: (a) for  $\text{O}_3$  and (b) for  $\text{PM}_{2.5}$ . Zero BCON offset corresponds to the original boundary conditions from CMAQ.



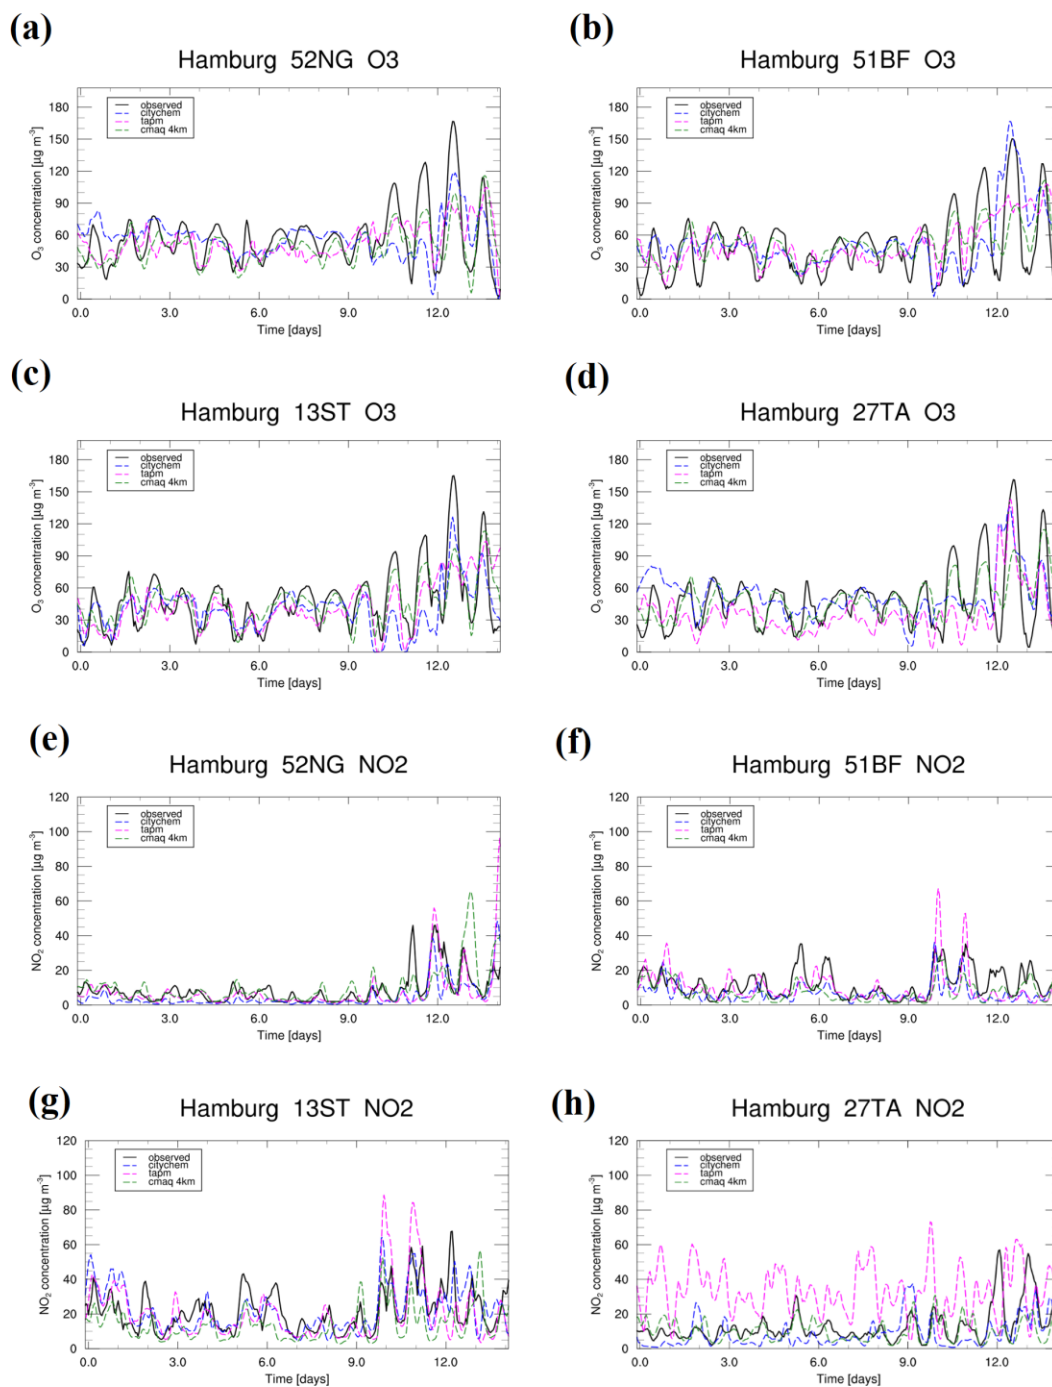

**Figure S3.** Comparison of EPISODE-CityChem (blue) with TAPM (magenta) and CMAQ (dark green) for (a) - (d) O<sub>3</sub> hourly concentrations (in  $\mu\text{g m}^{-3}$ ) and (e) - (h) NO<sub>2</sub> hourly concentrations (in  $\mu\text{g m}^{-3}$ ) at urban background stations (52NG, 51BF, 13ST, 27TA) during a 14-days period (12 - 25 July 2012). Observations are shown as black lines.

(a)

### Hamburg 13ST PM25

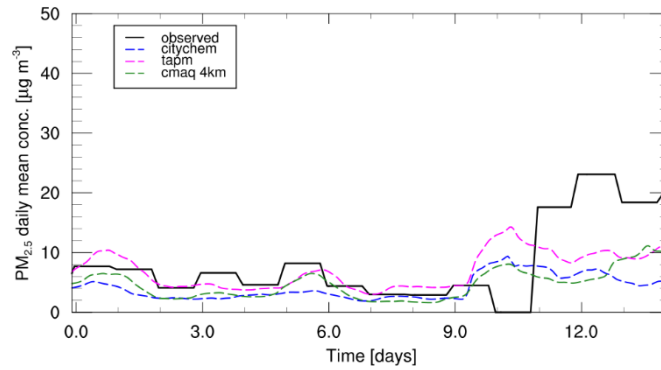

(b)

### Hamburg 13ST PM10

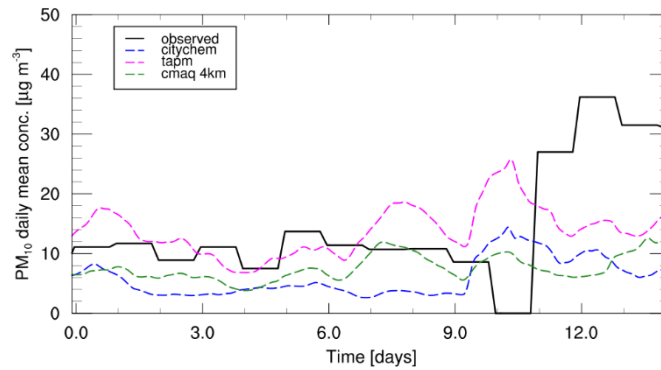

**Figure S4:** Comparison of EPISODE-CityChem (blue) with TAPM (magenta) and CMAQ (dark green) for (a) PM<sub>2.5</sub> daily mean concentrations ( $\mu\text{g m}^{-3}$ ) and (b) PM<sub>10</sub> daily mean concentrations ( $\mu\text{g m}^{-3}$ ) at urban background station 13ST during a 14-days period (12 - 25 July 2012). Observations are shown as black lines.

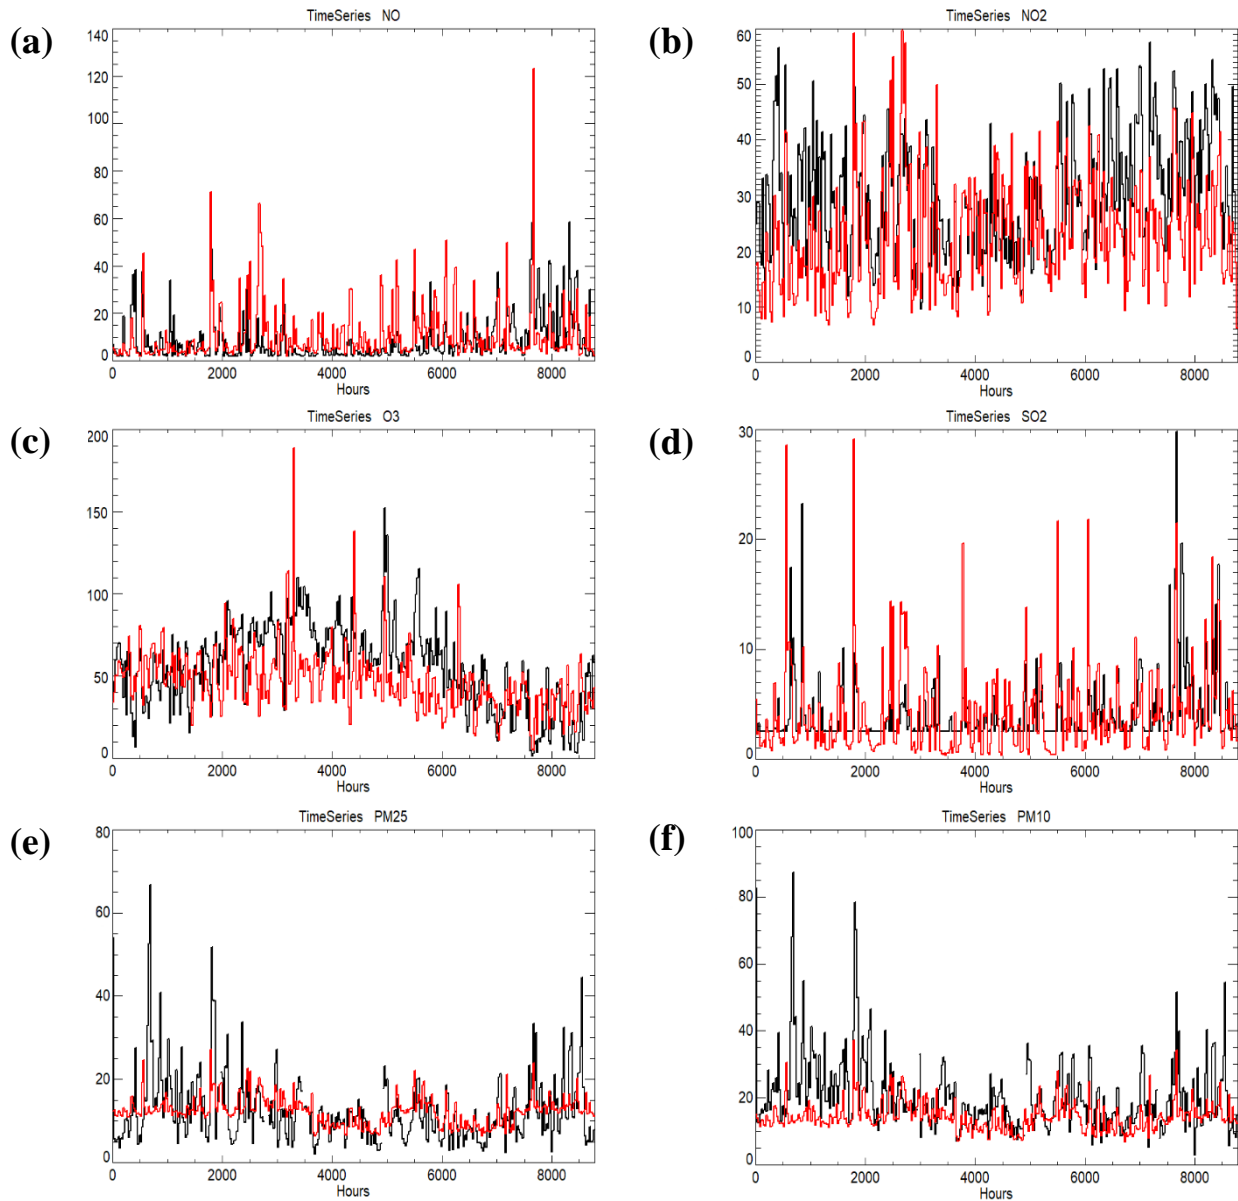

**Figure S5:** Time series comparing modelled and observed concentrations (in  $\mu\text{g m}^{-3}$ ) at Sternschanze (station 13ST): (a) NO (daily mean), (b) NO<sub>2</sub> (daily mean), (c) O<sub>3</sub> (maximum of daily 8-h running mean), (d) SO<sub>2</sub> (daily mean), (e) PM<sub>2.5</sub> (daily mean), and (f) PM<sub>10</sub> (daily mean). Observed values black lines, modelled values indicated as red lines. Lowest value of SO<sub>2</sub> observation data is 2.5  $\mu\text{g m}^{-3}$  (detection limit of the method).

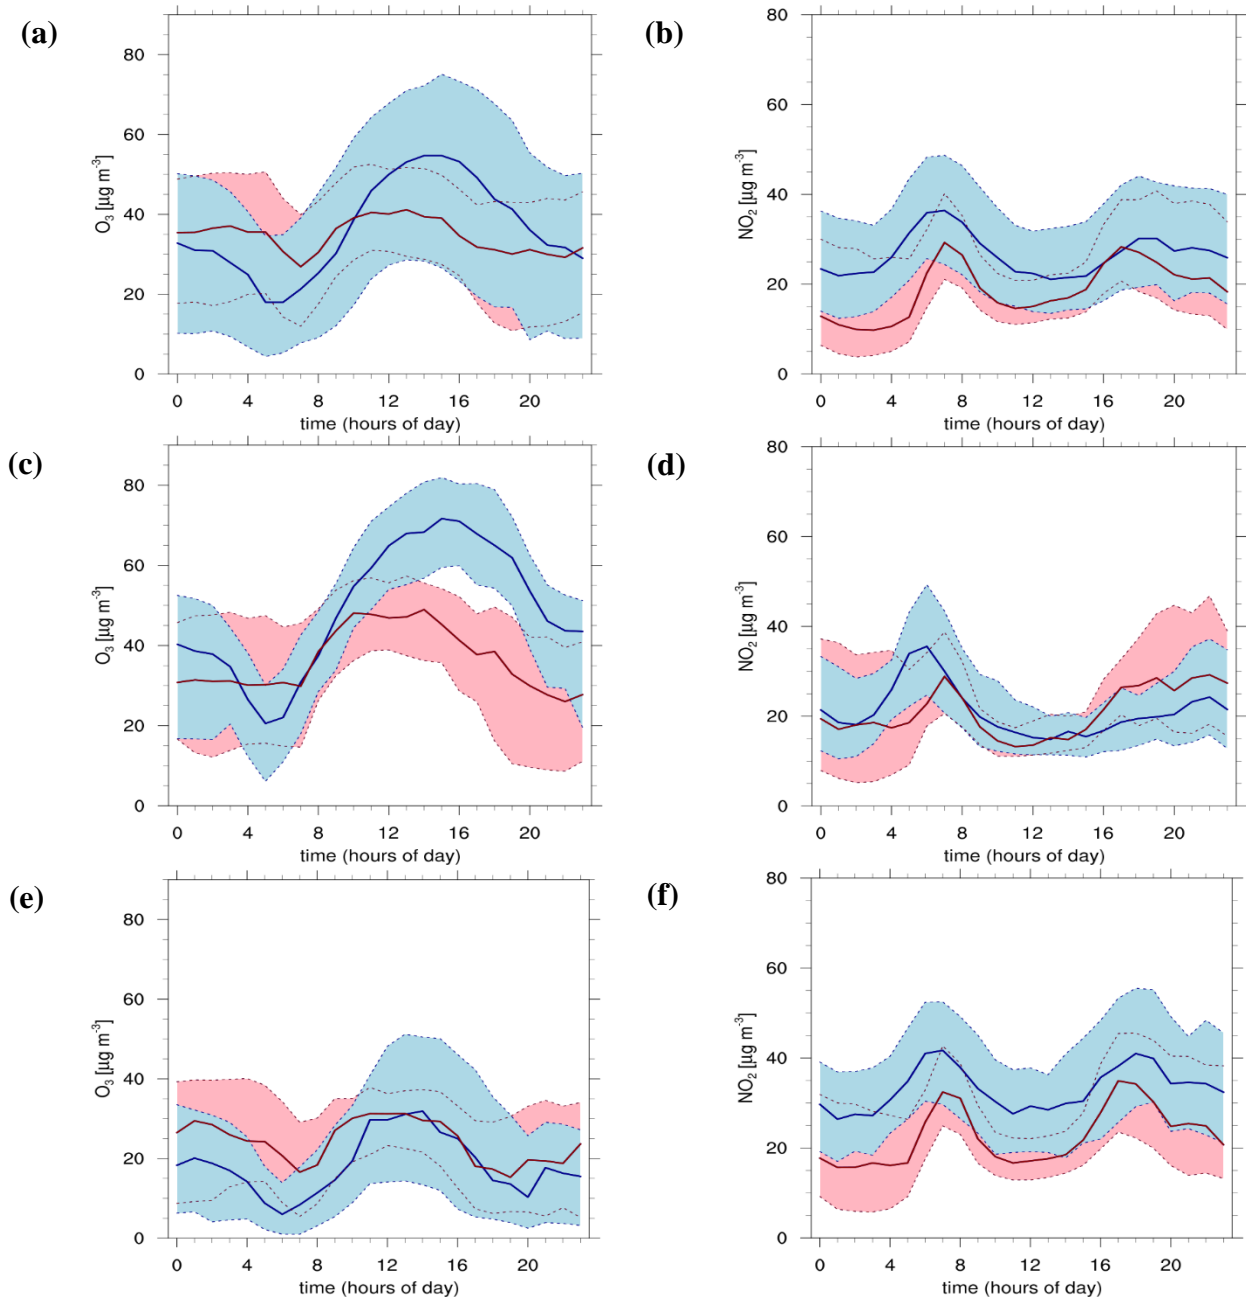

**Figure S6:** Diurnal cycle of  $\text{O}_3$  and  $\text{NO}_2$  concentrations (in  $\mu\text{g m}^{-3}$ ) at Sternschanze (station 13ST) based on the hourly modelled and observed values: (a) yearly  $\text{O}_3$ , (b) yearly  $\text{NO}_2$ , (c) summer  $\text{O}_3$ , (d) summer  $\text{NO}_2$ , (e) autumn  $\text{O}_3$ , and (f) autumn  $\text{NO}_2$ . Modelled median shown as red line and observed median as blue line. Shaded area reflects the band width between the 25th percentile and the 75th percentile (model red-shaded; observation blue-shaded). Summer is defined as June–August (JJA), autumn is defined as September–November (SON).

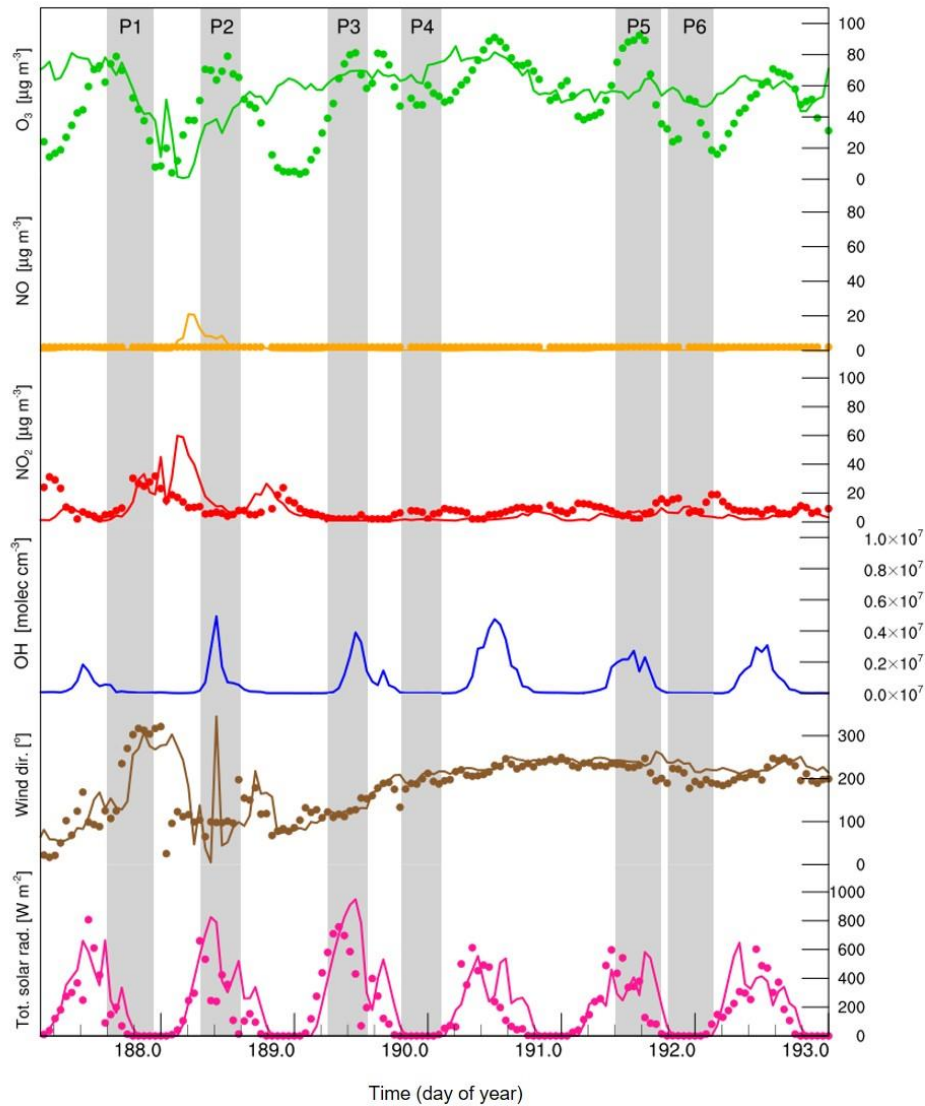

**Figure S7:** Ozone variation in a summer 6-day episode (5–10 July, 2012): hourly concentrations of  $O_3$  ( $\mu\text{g m}^{-3}$ ),  $NO$  ( $\mu\text{g m}^{-3}$ ),  $NO_2$  ( $\mu\text{g m}^{-3}$ ),  $OH$  radical (molecule  $\text{cm}^{-3}$ ), wind direction (degrees) and hourly total solar radiation ( $\text{W m}^{-2}$ ) at station Tatenberg (27TA) in the south east of Hamburg. Observations indicated by filled circles and model results by solid lines. Six short periods with ozone under predicted by the model at 13ST shown as grey shaded area, labelled with P1–P6.

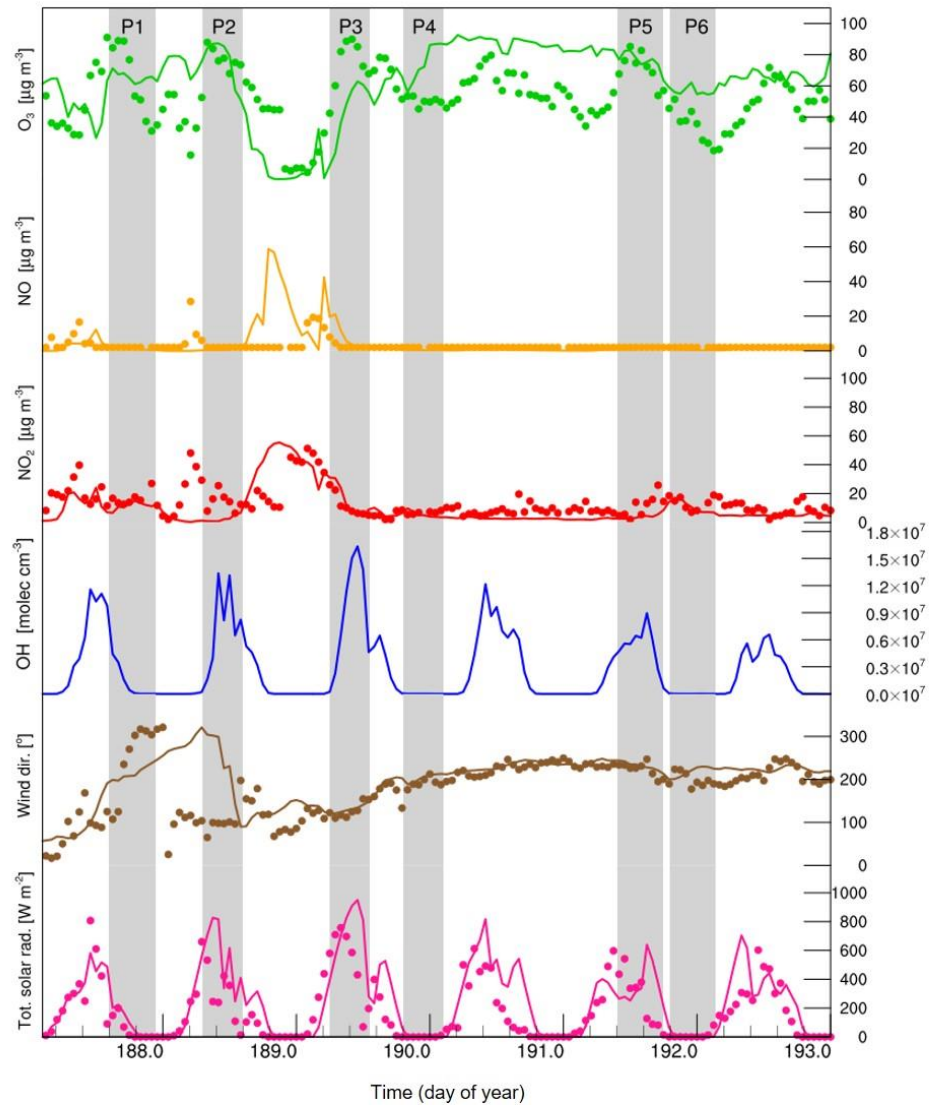

**Figure S8:** Ozone variation in a summer 6-day episode (5–10 July, 2012): hourly concentrations of  $O_3$  ( $\mu\text{g m}^{-3}$ ),  $NO$  ( $\mu\text{g m}^{-3}$ ),  $NO_2$  ( $\mu\text{g m}^{-3}$ ),  $OH$  radical (molecule  $\text{cm}^{-3}$ ), wind direction (degrees) and hourly total solar radiation ( $\text{W m}^{-2}$ ) at station Blankenese (54BL) at the western border of the domain. Observations indicated by filled circles and model results by solid lines. Six short periods with ozone under predicted by the model at 13ST shown as grey shaded area, labelled with P1–P6.

## References

Atkinson, R., Baulch, D. L., Cox, R.A., Crowley, J.N., Hampson, R. F., Hynes, R.G., Jenkin, M.

E., Rossi, M. J., Troe, J., and Subcommittee, I.: Evaluated kinetic and photochemical data for atmospheric chemistry: Volume II – gas phase reactions of organic species, *Atmos. Chem.*

*Physics*, 6, 3625–4055, <https://doi.org/10.5194/acp-6-3625-2006>, 2006.
